# Supplementary material for: Development of a Direct Non-Puncture Device for Measuring Portal Venous Pressure during Liver Transplantation—A Swine Model
Source: MDPI journal article supplement (doi:10.3390/bios13121007), 2023-11-30
Supplement: s1 [file s1]

# Development of a Direct, Non-Puncture Device for Measuring Portal Venous Pressure during Liver Transplantation - a Swine Model

**Supplementary Table S1.** Estimates of the alternate-form and alternate-form retest coefficients for minipig experiments.

| <b>Reliability</b>                                         | <b><i>r</i></b> | <b>p-value</b> |
|------------------------------------------------------------|-----------------|----------------|
| <b>Alternate-form coefficient</b>                          |                 |                |
| Minipig 1                                                  | 0.901           | 0.001*         |
| Minipig 2                                                  | 0.794           | 0.010*         |
| Minipig 3                                                  | 0.716           | 0.008*         |
| <b>Alternate-form retest coefficient across 3 minipigs</b> | 0.945           | <0.001*        |
